# Supplementary material for: Exhaled volatile substances mirror clinical conditions in pediatric chronic kidney disease
Source: PubMed Central journal article supplement (PMC5453591; doi:10.1371/journal.pone.0178745), 2017-06-01
Supplement: pone.0178745.s002.pdf [file pone.0178745.s002.pdf]

**S1 Table. Detailed information on relevant medication in CKD patients with conservative therapy (cons) or after kidney transplantation (KTx).**

|                                    | All patients |     | HUS        |           | GD          |           | MF          |           |
|------------------------------------|--------------|-----|------------|-----------|-------------|-----------|-------------|-----------|
|                                    | cons         | KTx | cons (n=9) | KTx (n=1) | cons (n=15) | KTx (n=3) | cons (n=24) | KTx (n=4) |
| Antihypertensive Drugs (yes/no)    | 26/22        | 8/0 | 6          | 1         | 11          | 3         | 9           | 4         |
| ACE-Inhibitors                     | 15           | 5   | 4          | 1         | 6           | 1         | 5           | 3         |
| AT1 receptor antagonists           | 13           | 1   | 4          |           | 8           |           | 1           | 1         |
| Beta blockers                      | 7            | 5   | 2          |           | 1           | 2         | 4           | 3         |
| Alpha blockers                     | 2            | 1   | 1          |           |             | 1         | 1           |           |
| Vasodilators                       | 6            | 4   | 1          |           | 2           | 2         | 3           | 2         |
| Diuretics                          | 9            | 6   | 4          | 1         | 3           | 1         | 2           | 4         |
| Immunosuppressive therapy (yes/no) | 12/36        | 8/0 |            |           |             |           |             |           |
| Corticosteroids                    | 3            | 8   |            | 1         | 3           | 3         |             | 4         |
| Calcineurin-Inhibitors             | 6            |     |            | 1         | 6           | 3         |             | 4         |
| Everolimus                         |              | 1   |            |           |             |           |             | 1         |
| Mycophenolate mofetil              | 7            | 7   | 1          | 1         | 6           | 3         |             | 3         |
| Statins                            | 3            | 2   | 1          | 1         | 2           | 1         |             |           |
| Erythropoietin                     | 4            | 3   | 2          | 1         | 1           |           | 1           | 2         |
| Growth Hormone                     | 1            |     |            |           |             |           | 1           |           |
| 25-Hydroxyvitamin D / Calcitriol   | 18           | 7   | 3          | 1         | 9           | 2         | 6           | 4         |
