# Supplementary material for: Exhaled volatile substances mirror clinical conditions in pediatric chronic kidney disease
Source: PubMed Central journal article supplement (PMC5453591; doi:10.1371/journal.pone.0178745), 2017-06-01
Supplement: pone.0178745.s003.pdf [file pone.0178745.s003.pdf]

**S2 Table. Comparison of selected VOC concentrations of CKD stage 1 patients with and without antihypertensive drugs.**

|                                   | <b>Antihypertensive Drugs in CKD stage 1 patients</b> |                       |
|-----------------------------------|-------------------------------------------------------|-----------------------|
|                                   | No (n = 22)                                           | Yes (n = 17)          |
| Age                               | 9.00 (4.0 - 17.0)                                     | 12.0 (5.00 - 18.0)    |
| absolute BMI [kg/m <sup>2</sup> ] | 17.7 (13.4 - 22.3)                                    | 19.5 (14.2 - 24.3)    |
| standardized BMI [SDS]            | -0.09 (-1.90 - 1.81)                                  | 0.12 (-2.20 - 1.92)   |
| Duration of disease [y]           | 5.92 (0.58 - 16.7)                                    | 3.92 (0.17 - 12.3)    |
| Urea [mmol/l]                     | 3.44* (1.79 - 7.38)                                   | 5.88* (2.64 - 9.37)   |
| eGFR [ml/min/1.73m <sup>2</sup> ] | 141 (99 - 200)                                        | 126 (94 - 182)        |
| Conservative treatment / KTx      | 22                                                    | 16 / 1                |
| HUS / GD / MF / KTx               | 3 / 4 / 15                                            | 4 / 9 / 4             |
| Immunosuppressive therapy (y/n)   | 3 / 19                                                | 8 / 9                 |
| Statins (y/n)                     | 0 / 22                                                | 1 / 16                |
| Ammonia [ppbV]                    | 404 (92.3 - 799)                                      | 457 (265 - 823)       |
| Methylamine [ppbV]                | 7.26 (1.91 - 24.6)                                    | 6.65 (1.42 - 29.0)    |
| Ethanol [ppbV]                    | 107.1 (15.14 - 1293)                                  | 132.0 (46.03 - 428.7) |
| Acetone [ppbV]                    | 225 (202 - 259)                                       | 228 (146 - 702)       |
| DMS [ppbV]                        | 11.8 (3.52 - 57.7)                                    | 15.1 (4.77 - 69.7)    |
| Isoprene [ppbV]                   | 44.5 (1.80 - 268)                                     | 73.1 (8.30 - 286)     |
| Pentanal [ppbV]                   | 7.30 (3.29 - 27.7)                                    | 8.18 (2.73 - 59.2)    |
| Heptanal [ppbV]                   | 2.29 (0.17 - 9.78)                                    | 4.40 (0.66 - 11.2)    |
